# Supplementary material
Source: Springer Nature journal article supplement (https://www.springermedizin.de/resource/supplementary/12958_2007_419_MOESM7_ESM.pdf/9567838)

**30**

**45**

**60**

**CK**

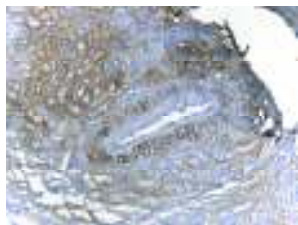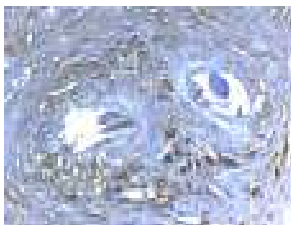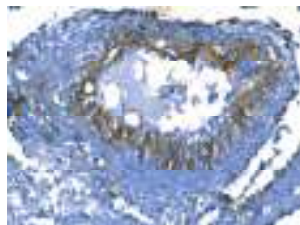

**VEGF**

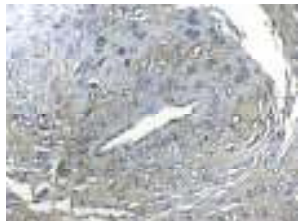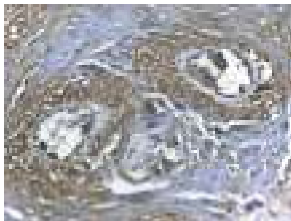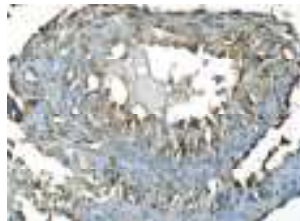

**MA**

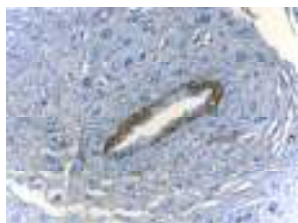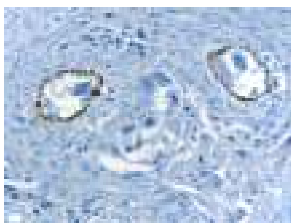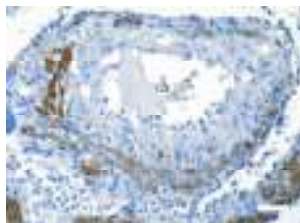

**H**

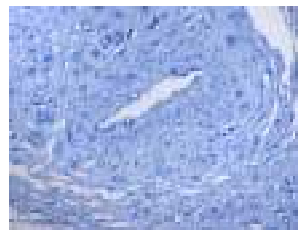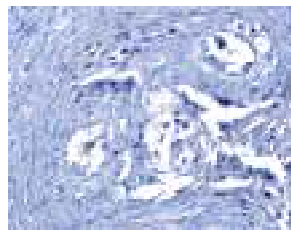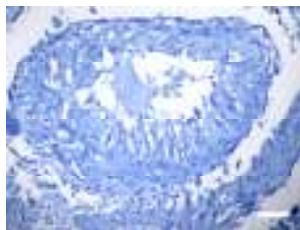

Supplement: MOESM7 [file 9567838]
